# Supplementary material for: Molecular anchoring to oxide surfaces in ultrahigh vacuum and in aqueous electrolytes: phosphonic acids on atomically-defined cobalt oxide
Source: Royal Society of Chemistry journal article supplement (doi:10.1039/c9cp03779a), 2019-01-01
Supplement: c9cp03779a1.pdf [file c9cp03779a1.pdf]

## Supporting Information

# **Molecular Anchoring to Oxide Surfaces in Ultrahigh Vacuum and in Aqueous Electrolytes: Phosphonic Acids on Atomically-Defined Cobalt Oxide**

Manon Bertram<sup>1</sup>, Christian Schuschke<sup>1</sup>, Fabian Waidhas<sup>1</sup>, Matthias Schwarz<sup>1</sup>,  
Chantal Hohner<sup>1</sup>, María A. Montero<sup>2</sup>, Olaf Brummel<sup>1,\*</sup>, Jörg Libuda<sup>1</sup>

<sup>1</sup>*Interface Research and Catalysis, Erlangen Catalysis Resource Center, Friedrich-Alexander-Universität Erlangen-Nürnberg, Egerlandstraße 3, D-91058 Erlangen, Germany*

<sup>2</sup>*Instituto de Química Aplicada del Litoral, IQAL (UNL-CONICET), Santiago del Estero 2829, Santa Fe, Argentina*

\* corresponding author: [olaf.brummel@fau.de](mailto:olaf.brummel@fau.de)

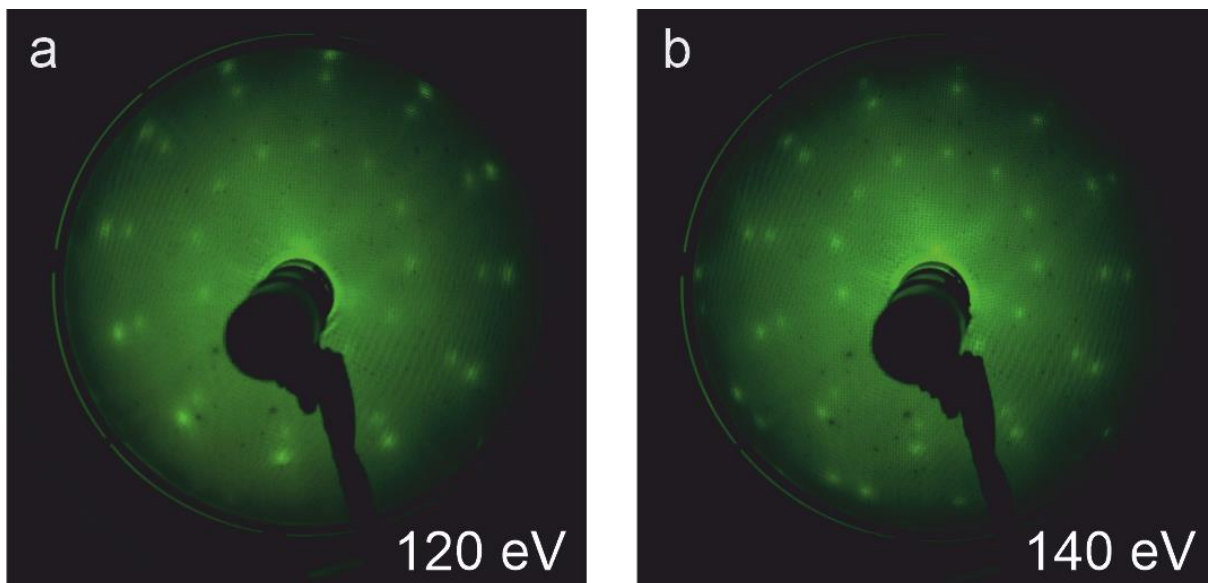

**Figure S1:** LEED images of the  $\text{Co}_3\text{O}_4(111)$  film after preparation at 120 (a) and 140 eV (b).

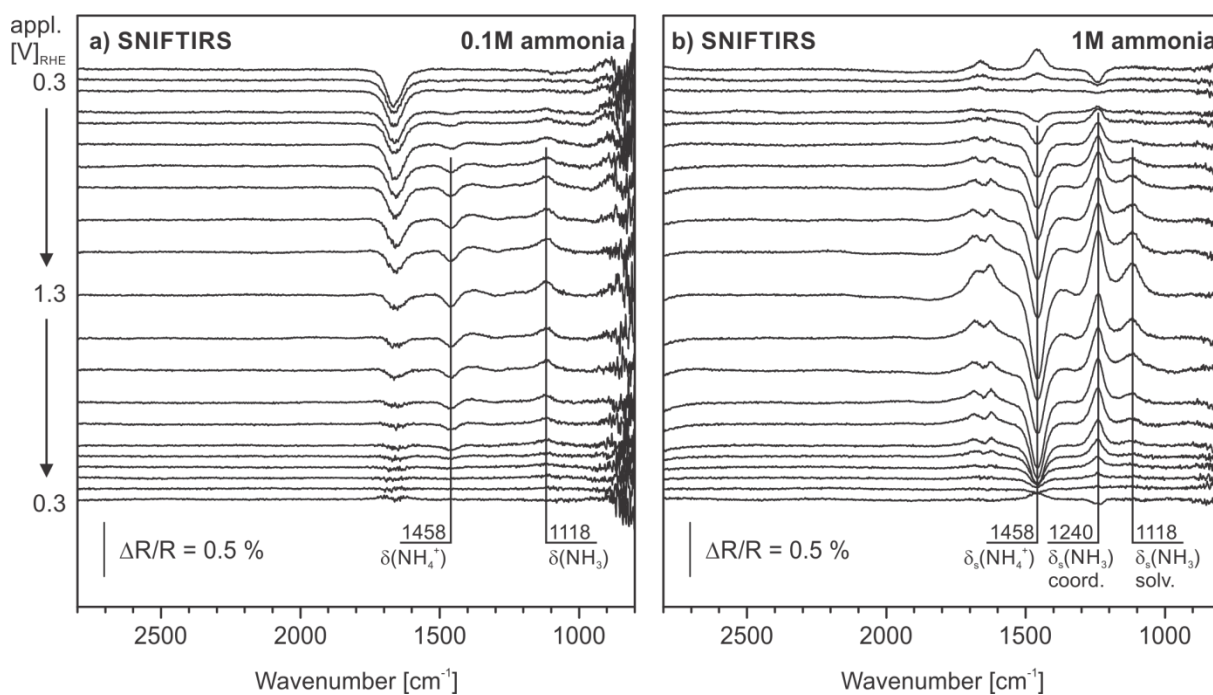

**Figure S2:** SNIFTIRS spectra of 0.1 M (a) and 1 M (b) ammonia buffer (pH 10) on  $\text{Co}_3\text{O}_4(111)/\text{Ir}(100)$  measured between 0.3 and 1.3  $\text{V}_{\text{RHE}}$  in p-polarization. The reference potential is 0.3  $\text{V}_{\text{RHE}}$ .

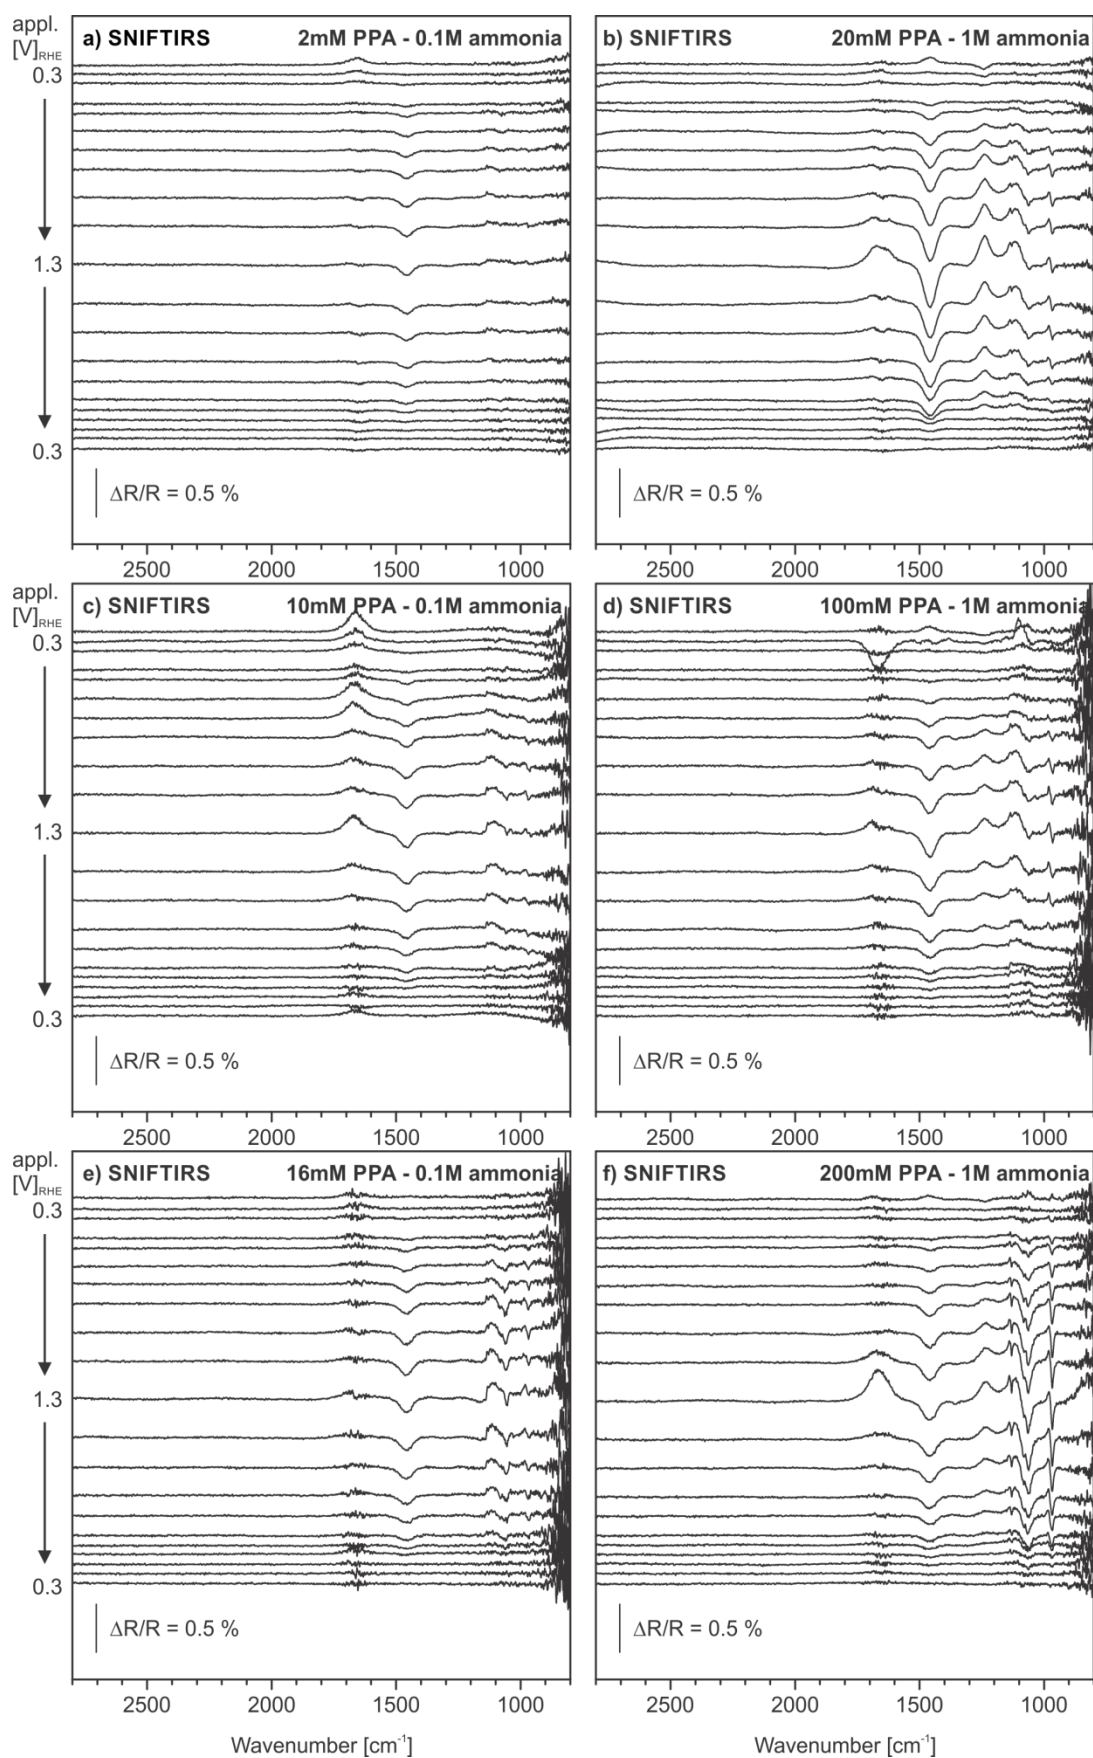

**Figure S3:** SNIFTIRS spectra recorded after adsorption of PPA on  $\text{Co}_3\text{O}_4(111)/\text{Ir}(100)$  at different concentrations of buffer and PPA; left: 0.1 M ammonia buffer with 2mM (a), 10 mM (c), and 16 mM PPA (e); right: 1 M ammonia buffer with 20 mM (b), 100 mM (d), and 200 mM PPA (f). The reference potential is 0.3  $V_{\text{RHE}}$ .
